# Supplementary material for: How Much Are Biosimilars Used in Clinical Practice? A Retrospective Italian Population-Based Study of Erythropoiesis-Stimulating Agents in the Years 2009–2013
Source: PubMed Central journal article supplement — BioDrugs. 2015 Jul 14;29(4):275–84. doi: 10.1007/s40259-015-0132-7 (PMC4561997; doi:10.1007/s40259-015-0132-7), 2015-07-14
Supplement: 40259_2015_132_MOESM1_ESM.pdf [file 40259_2015_132_MOESM1_ESM.pdf]

| <b>Characteristics</b>                       | <b>Caserta</b>                | <b>Tuscany</b>         | <b>Treviso</b>    | <b>Palermo</b> |
|----------------------------------------------|-------------------------------|------------------------|-------------------|----------------|
| <b>Population</b>                            | 969,931                       | 3,667,946              | 624,106           | 1,309,714      |
| <b>Study years</b>                           | 2009 - 2013                   | 2009 - 2013            | 2009 - 2013       | 2011-2013      |
| <b>Type of database</b>                      | Administrative + GPs*         | Administrative         | Administrative    | Administrative |
| <b>Anagrafic data</b>                        | Yes                           | Yes                    | Yes               | Yes            |
| <b>Mortality registry</b>                    | Yes                           | Yes (2004-2010)        | Yes (1996-2011)   | Yes            |
| <b>Hospital Discharge diagnoses</b>          | Yes (2007 - 2013)             | Yes (1996 - 2013)      | Yes (2009 - 2013) | Yes            |
| <b>Drug dispensing</b>                       | Yes                           | Yes                    | Yes               | Yes            |
| <b>Electronic therapeutic plan</b>           | Yes                           | No                     | Yes               | No             |
| <b>Emergency Department access</b>           | Yes                           | Yes                    | Yes               | No             |
| <b>Healthcare service payment exemptions</b> | Yes                           | Yes                    | Yes               | Yes            |
| <b>Results of laboratory data</b>            | Yes (only starting from 2013) | Yes (only for one LHU) | Yes               | No             |
| <b>Outpatient diagnostic tests/visits</b>    | Yes                           | Yes                    | Yes               | No             |
