# Supplementary material for: How Much Are Biosimilars Used in Clinical Practice? A Retrospective Italian Population-Based Study of Erythropoiesis-Stimulating Agents in the Years 2009–2013
Source: PubMed Central journal article supplement — BioDrugs. 2015 Jul 14;29(4):275–84. doi: 10.1007/s40259-015-0132-7 (PMC4561997; doi:10.1007/s40259-015-0132-7), 2015-07-14
Supplement: 40259_2015_132_MOESM2_ESM.pdf [file 40259_2015_132_MOESM2_ESM.pdf]

| <b>BRAND NAME</b>  | <b>Molecule</b>                         | <b>ATC</b> | <b>Type of ESA</b> | <b>Available in the years 2009-2013</b> |
|--------------------|-----------------------------------------|------------|--------------------|-----------------------------------------|
| <b>Aranesp</b>     | Darbepoetin alpha                       | B03XA02    | Originator         | Tuscany, Treviso, Caserta, Palermo      |
| <b>Nespo</b>       | Darbepoetin alpha                       | B03XA02    | Originator         | Tuscany, Caserta                        |
| <b>Eprex</b>       | Epoetin alpha                           | B03XA01    | Reference product  | Tuscany, Treviso, Caserta, Palermo      |
| <b>Binocrit</b>    | Epoetin alpha                           | B03XA01    | Biosimilar         | Tuscany, Treviso, Caserta, Palermo      |
| <b>Abseamed</b>    | Epoetin alpha                           | B03XA01    | Biosimilar         | Tuscany                                 |
| <b>Neorecormon</b> | Epoetin beta                            | B03XA01    | Originator         | Tuscany, Treviso, Caserta, Palermo      |
| <b>Eporatio</b>    | Epoetin theta                           | B03XA01    | Originator         | Tuscany, Caserta                        |
| <b>Retacrit</b>    | Epoetin zeta                            | B03XA01    | Biosimilar         | Tuscany, Treviso, Caserta, Palermo      |
| <b>Mircera</b>     | Methoxypolyethylene glycol-epoetin beta | B03XA03    | Originator         | Tuscany, Treviso, Caserta, Palermo      |
| <b>Globuren</b>    | Epoetin alpha                           | B03XA01    | Originator         | Tuscany                                 |
