# Supplementary figures and images for: How Much Are Biosimilars Used in Clinical Practice? A Retrospective Italian Population-Based Study of Erythropoiesis-Stimulating Agents in the Years 2009–2013
Source: PubMed Central journal article supplement — BioDrugs. 2015 Jul 14;29(4):275–84. doi: 10.1007/s40259-015-0132-7 (PMC4561997; doi:10.1007/s40259-015-0132-7), 2015-07-14

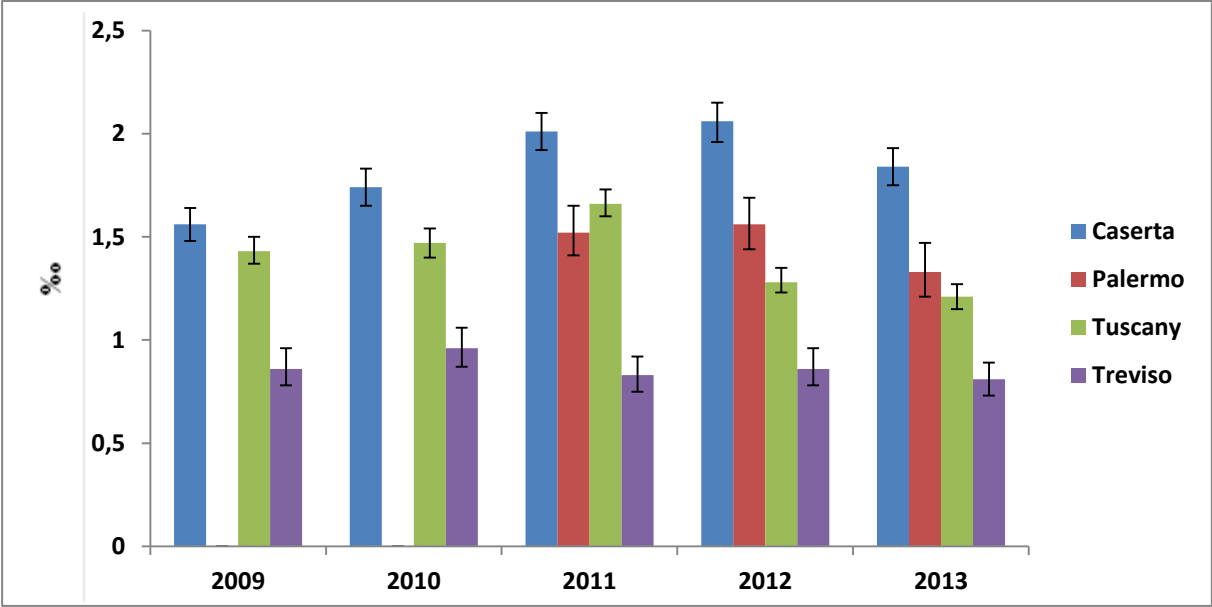

Supplement: 40259_2015_132_MOESM4_ESM.pdf [file 40259_2015_132_MOESM4_ESM.pdf]

(a) CKD

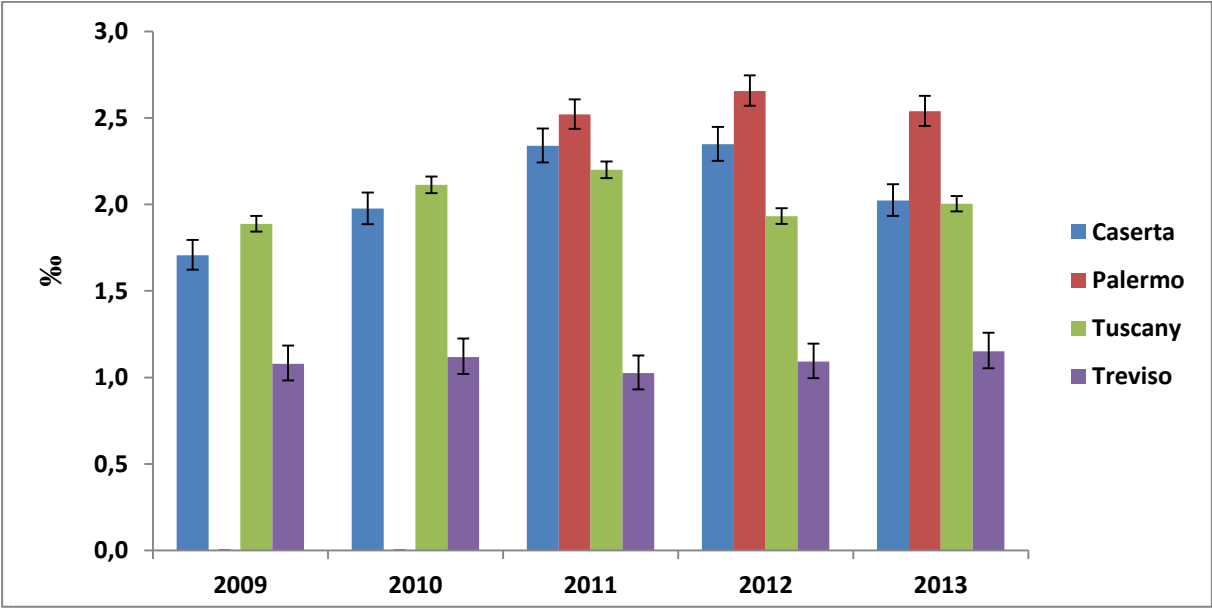

(b) Cancer

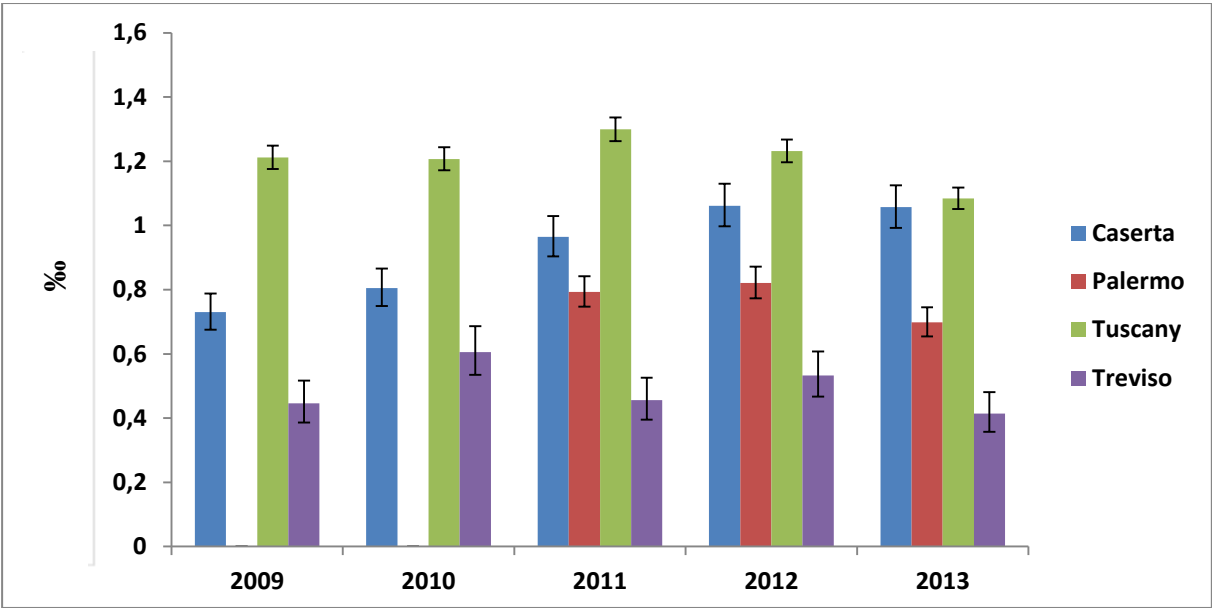

Supplement: 40259_2015_132_MOESM5_ESM.pdf [file 40259_2015_132_MOESM5_ESM.pdf]

(a) CKD

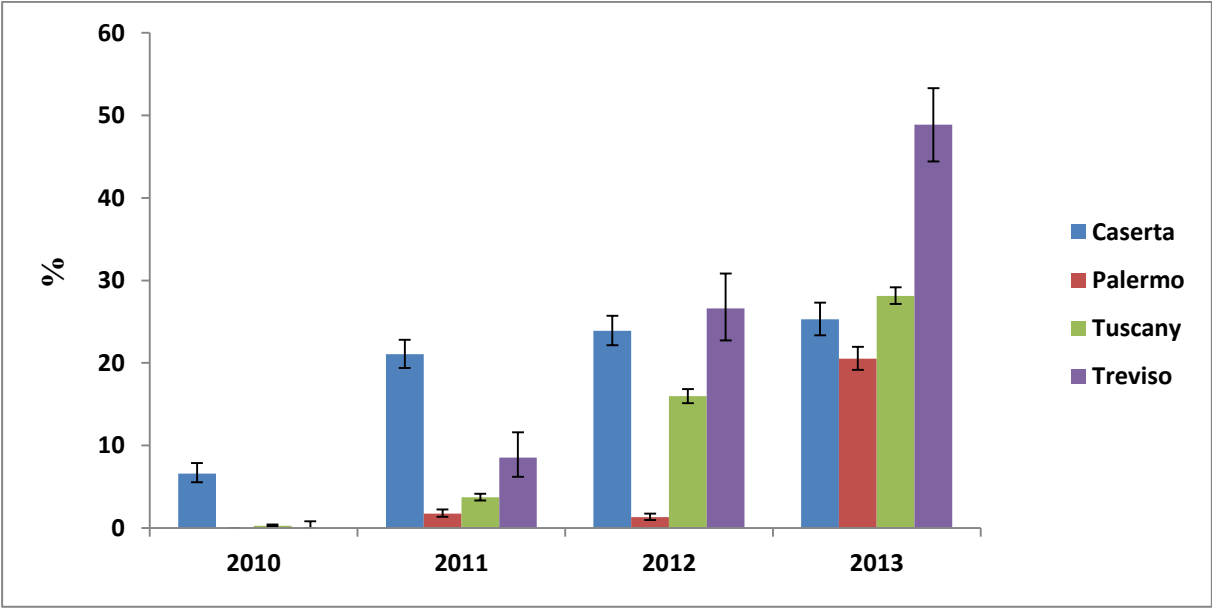

(b) Cancer

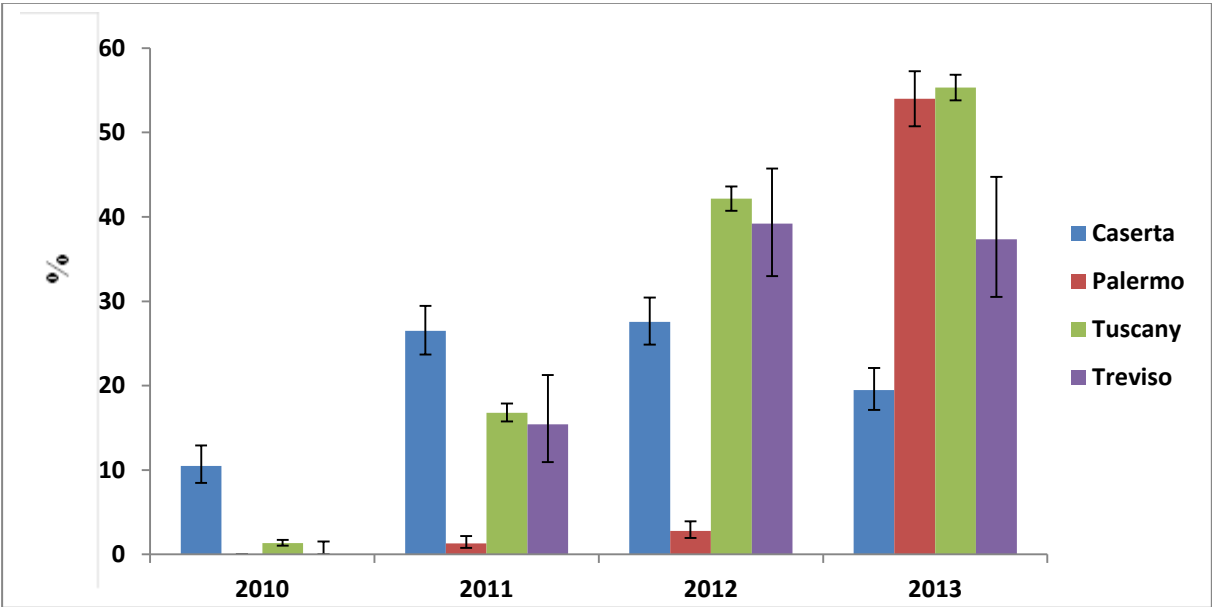

Supplement: 40259_2015_132_MOESM6_ESM.pdf [file 40259_2015_132_MOESM6_ESM.pdf]

**Caserta**

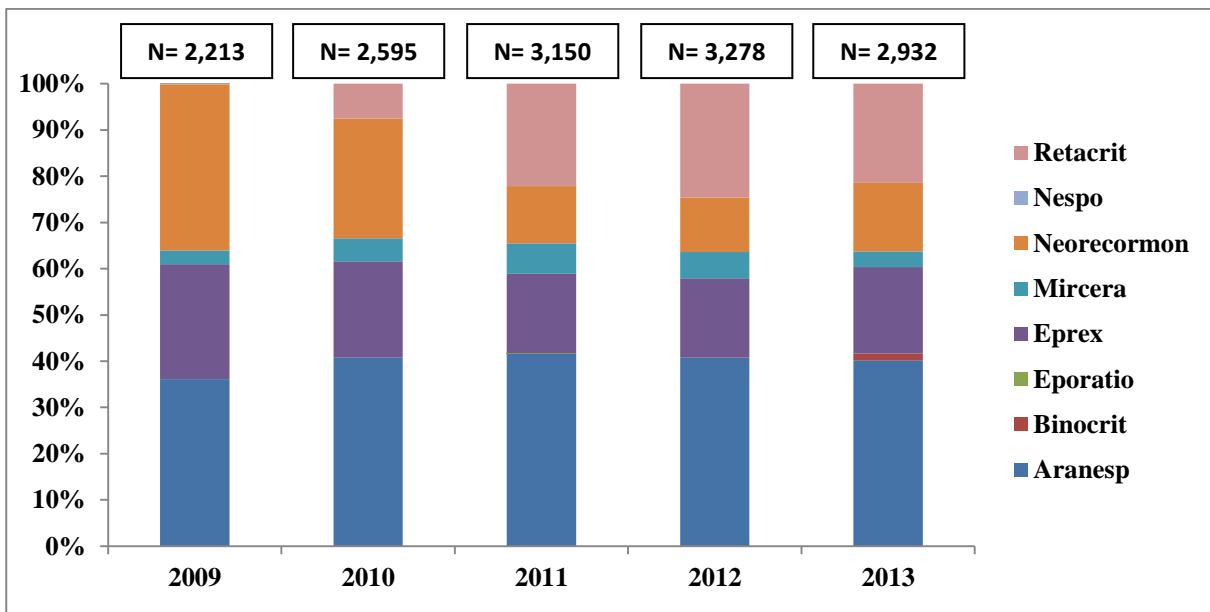

**Tuscany**

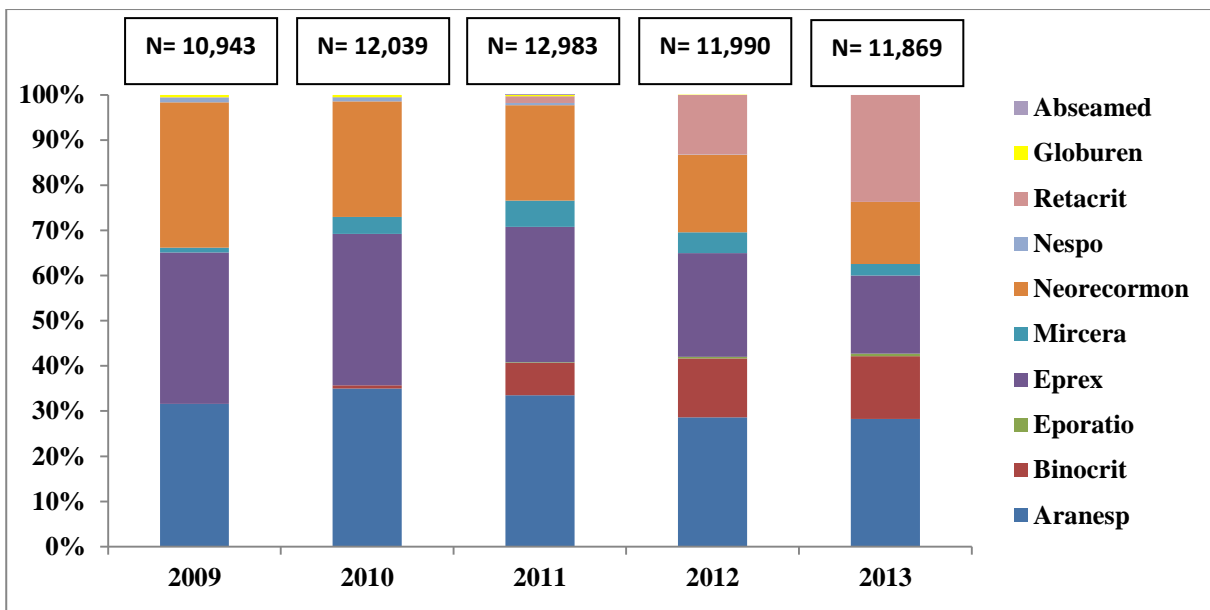

**Treviso**

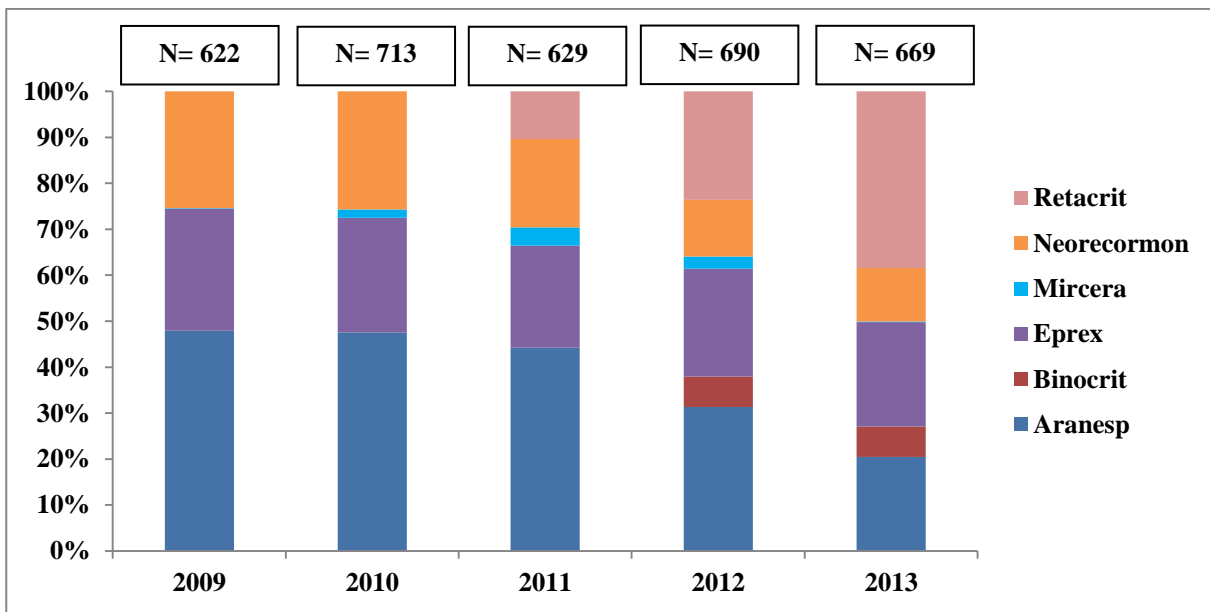

**Palermo**

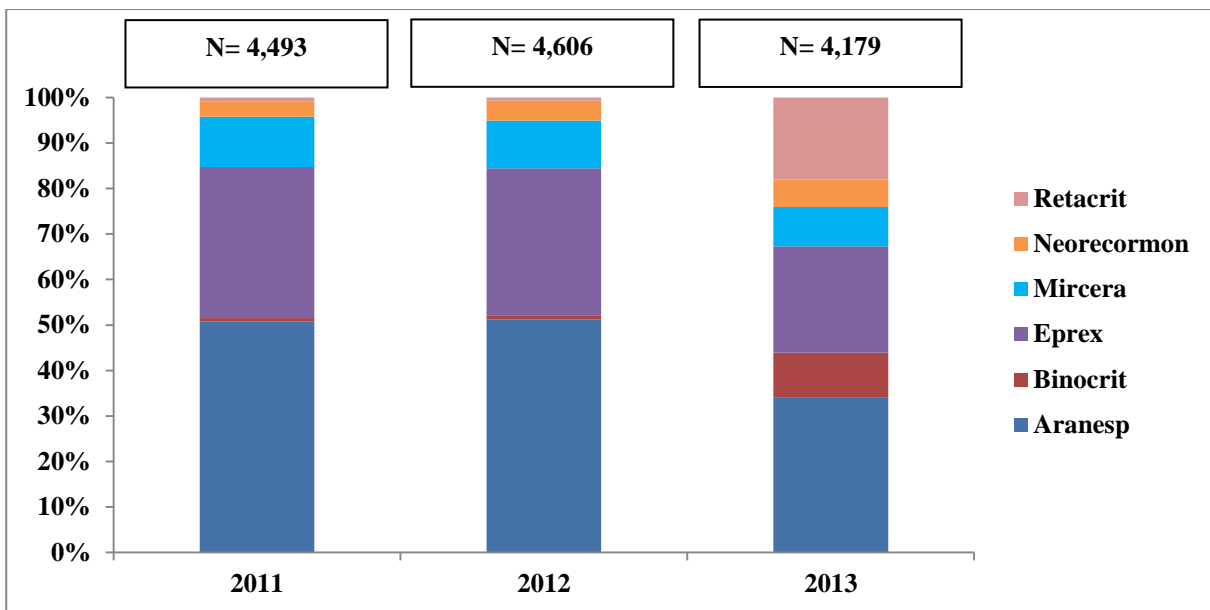

Supplement: 40259_2015_132_MOESM7_ESM.pdf [file 40259_2015_132_MOESM7_ESM.pdf]
